# Supplementary material
Source: HighWire-hosted journal article supplement (https://bmjopen.bmj.com/content/14/3/e080053)
Supplement: inline-supplementary-material-2 [file inline-supplementary-material-2.pdf]

## Appendix: English translation of questionnaire content

### Page 1 of 28

#### Introductory text

Thank you for your interest in the Steno Tech survey about you and your insulin pump.

Before you reply to the questionnaire, please sign the consent statement below. Your answer will help us to learn more about how people with type 1 diabetes use and live with their insulin pump. We will use this knowledge to improve the treatment offers for insulin pump users at Nordsjællands Hospital Hillerød and Steno Diabetes Center Copenhagen.

Once again, we want to emphasize that none of your healthcare providers will see your questionnaire response.

---

#### Consent form

Sign with your mouse or finger by pressing "Add signature". You will consent to let us process your data in accordance with the information in the letter you received in e-Boks.

---

I do not want to answer the questionnaire, but I consent to let my information in my medical journal and Statistics Denmark may be used in the Steno Tech-project in an anonymized form.

---

I do not want to reply to the questionnaire, and I do not wish to share information from my medical journal or Statistics Denmark.

---

We may have mistakenly included you in our study. If you do not have an insulin pump, [click here](#).

---

Depending on your answer to the above, you will be taken to the questionnaire when you press "next page" below.

---

## Page 2 of 28

| Scale/item [branching logic]                                                                                                                                                                                                                                                                                                                                                                                                                                                                                                                                                | Question                                                                                                                                         | Response categories                                                                                                                                                                                                                                                                                                                          |
|-----------------------------------------------------------------------------------------------------------------------------------------------------------------------------------------------------------------------------------------------------------------------------------------------------------------------------------------------------------------------------------------------------------------------------------------------------------------------------------------------------------------------------------------------------------------------------|--------------------------------------------------------------------------------------------------------------------------------------------------|----------------------------------------------------------------------------------------------------------------------------------------------------------------------------------------------------------------------------------------------------------------------------------------------------------------------------------------------|
| <p><b>The first part of the questionnaire is about your insulin pump usage. There are also questions about your use of sensor, if applicable.</b></p> <p><b>When you are done answering all the questions on a page, press “next page” at the bottom of the page in order to continue.</b></p> <p><b>It takes about 30-40 minutes to complete the entire questionnaire. You can take a break along the way and continue the questionnaire later by simply shutting down the page and using the link in e-Boks again – disregard the “save and return later” button.</b></p> |                                                                                                                                                  |                                                                                                                                                                                                                                                                                                                                              |
| pumptype                                                                                                                                                                                                                                                                                                                                                                                                                                                                                                                                                                    | What insulin pump are you currently using? You will be shown a picture of the insulin pump below when you click on the name of the insulin pump. | 1. MiniMed 640G<br>2. MiniMed 670G<br>3. MiniMed Paradigm/VEO<br>4. Accu-Chek Combo<br>5. Accu-Chek Insight<br>6. Omnipod<br>7. Medtrum<br>8. Tandem t:slim X2<br>9. YpsoPump<br>10. Animas Vibe<br>11. Other<br>12. I use a hybrid closed-loop system that I built myself with an open-source software such as OPENAPS, AndroidAPS or Loop. |
| pumptype_other [if pumptype = 11]                                                                                                                                                                                                                                                                                                                                                                                                                                                                                                                                           | What other insulin pump are you currently using?                                                                                                 | Open-ended response                                                                                                                                                                                                                                                                                                                          |
| diabetesdebut                                                                                                                                                                                                                                                                                                                                                                                                                                                                                                                                                               | In which year were you diagnosed with type 1 diabetes? If you do not remember the exact year, please provide an approximate estimate.            | Open-ended response                                                                                                                                                                                                                                                                                                                          |
| pumpyear                                                                                                                                                                                                                                                                                                                                                                                                                                                                                                                                                                    | In which year did you get your first insulin pump? If you do not remember the exact year, please provide an approximate estimate.                | Open-ended response                                                                                                                                                                                                                                                                                                                          |

|                                              |                                                                                                                                       |                                                                                                                                                                                                                                                                                                                                                                                                                                                                                                                                                                                                                                           |
|----------------------------------------------|---------------------------------------------------------------------------------------------------------------------------------------|-------------------------------------------------------------------------------------------------------------------------------------------------------------------------------------------------------------------------------------------------------------------------------------------------------------------------------------------------------------------------------------------------------------------------------------------------------------------------------------------------------------------------------------------------------------------------------------------------------------------------------------------|
| pumpindication                               | What was the reason that you were initially offered an insulin pump by your healthcare provider? Feel free to choose several reasons. | 1. I had too high long-term blood glucose (HbA1c)<br>2. I had major fluctuations in my blood sugar<br>3. I could not feel low blood-sugars<br>4. Other<br>5. Do not know/do not remember                                                                                                                                                                                                                                                                                                                                                                                                                                                  |
| pumpindication_other [if pumpindication = 4] | What other reasons were behind you being offered an insulin pump?                                                                     | Open-ended response                                                                                                                                                                                                                                                                                                                                                                                                                                                                                                                                                                                                                       |
| pumpwhy                                      | What was(were) the reason(s) you initially agreed to use the insulin pump? Feel free to choose several reasons.                       | 1. To improve long-term blood glucose (HbA1c)<br>2. To achieve a more stable blood sugar (fewer fluctuations)<br>3. To reduce the number of high blood sugars<br>4. To reduce the number of low blood sugars<br>5. To get better sleep<br>6. To be able to eat more flexibly<br>7. To be able to exercise more spontaneously<br>8. To make it easier to take and dose insulin<br>9. To avoid injecting myself several times a day<br>10. My healthcare provider recommended it to me<br>11. Other insulin pump users recommended it to me<br>12. To make my diabetes fill less in my life<br>13. Other<br>14. Do not know/do not remember |
| pumpwhy_other [if pumpwhy = 13]              | What other reasons were there, for you to agree to start insulin pump treatment?                                                      | Open-ended response                                                                                                                                                                                                                                                                                                                                                                                                                                                                                                                                                                                                                       |

## Page 3 of 28

| Scale/item [branching logic]                                                          | Question                                                                                                  | Response categories                                                                                                                                                                                                                                                 |
|---------------------------------------------------------------------------------------|-----------------------------------------------------------------------------------------------------------|---------------------------------------------------------------------------------------------------------------------------------------------------------------------------------------------------------------------------------------------------------------------|
| <b>The following questions are about how you are using your current insulin pump.</b> |                                                                                                           |                                                                                                                                                                                                                                                                     |
| bolus                                                                                 | How do you usually take bolus insulin?                                                                    | 1. Bolus calculator/bolus guide<br>2. Manual bolus (including fast bolus)<br>3. I use both equally<br>4. I very rarely take bolus insulin                                                                                                                           |
| bolus_whynot [if bolus = 4]                                                           | Why do you not typically use the bolus guide to calculate bolus insulin?                                  | 1. It is too difficult to use<br>2. I did not learn it at pump start and have not started doing it since<br>3. I do not trust the bolus guide's calculations<br>4. I calculate bolus myself, as my experience is that this works best<br>5. Other<br>6. Do not know |
| bolus_whynot_other [if bolus_whynot = 5]                                              | What other reasons are there for why you do not typically use the bolus guide to calculate bolus insulin? | Open-ended response                                                                                                                                                                                                                                                 |
| bolususe_intro [if pumptype ≠ 11 or 12 and bolus ≠ 4]                                 | How often do you use your bolus calculator to...                                                          |                                                                                                                                                                                                                                                                     |
| bolususe1 [if pumptype ≠ 11 or 12 and bolus ≠ 4]                                      | ... calculate bolus for food?                                                                             | 1. Never/rarely<br>2. Occasionally<br>3. Often<br>4. Always/almost always                                                                                                                                                                                           |
| bolususe2 [if pumptype ≠ 11 or 12 and bolus ≠ 4]                                      | ... calculate correction-insulin for elevated blood sugar?                                                | 1. Never/rarely<br>2. Occasionally<br>3. Often<br>4. Always/almost always                                                                                                                                                                                           |
| bolusbasalfunctions_intro [if pumptype ≠ 2, 11 or 12]                                 | How often do you use these insulin pump functions when they are relevant? <b>[stand-alone pump users]</b> |                                                                                                                                                                                                                                                                     |
| bolus1 [if pumptype ≠ 2, 11 or 12 and bolus ≠ 4]                                      | Combined bolus when it is relevant (e.g., for fast food)                                                  | 1. Never/rarely<br>2. Occasionally<br>3. Often<br>4. Always/almost always                                                                                                                                                                                           |
| bolus2 [if pumptype ≠ 2, 11 or 12 and bolus ≠ 4]                                      | Extended bolus when it is relevant (e.g., low blood sugar before a meal)                                  | 1. Never/rarely<br>2. Occasionally<br>3. Often<br>4. Always/almost always                                                                                                                                                                                           |
| basal1 [if pumptype ≠ 2, 11 or 12]                                                    | Temporary basal up when it is relevant (e.g., in the case of illness)                                     | 1. Never/rarely<br>2. Occasionally<br>3. Often                                                                                                                                                                                                                      |

|                                                             |                                                                                                                                     |                                                                                                                                                                           |
|-------------------------------------------------------------|-------------------------------------------------------------------------------------------------------------------------------------|---------------------------------------------------------------------------------------------------------------------------------------------------------------------------|
|                                                             |                                                                                                                                     | 4. Always/almost always                                                                                                                                                   |
| basal2 [if pumptype ≠ 2, 11 or 12]                          | Temporary basal down when it is relevant (e.g., exercise)                                                                           | 1. Never/rarely<br>2. Occasionally<br>3. Often<br>4. Always/almost always                                                                                                 |
| [manuelfunctions_intro]                                     | How often do you use these insulin pump functions when they are relevant, and you are in manual mode? <b>[Medtronic 670G users]</b> | 1. I am almost never in manual mode besides when I change infusion set.                                                                                                   |
| bolus1_670G [if pumptype = 2 and manuelfunctions_intro ≠ 1] | Combined bolus when it is relevant (e.g., fast food)                                                                                | 1. Never/rarely<br>2. Occasionally<br>3. Often<br>4. Always/almost always                                                                                                 |
| bolus2_670G [if pumptype = 2 and manuelfunctions_intro ≠ 1] | Extended bolus when it is relevant (e.g., low blood sugar before a meal)                                                            | 1. Never/rarely<br>2. Occasionally<br>3. Often<br>4. Always/almost always                                                                                                 |
| basal1_670G [if pumptype = 2 and manuelfunctions_intro ≠ 1] | Temporary basal up when it is relevant (e.g., in the case of illness)                                                               | 1. Never/rarely<br>2. Occasionally<br>3. Often<br>4. Always/almost always                                                                                                 |
| basal2_670G [if pumptype = 2 and manuelfunctions_intro ≠ 1] | Temporary basal down when it is relevant (e.g., exercise)                                                                           | 1. Never/rarely<br>2. Occasionally<br>3. Often<br>4. Always/almost always                                                                                                 |
| autofunctions_intro [if pumptype = 2]                       | How often do you use temporary target-blood sugar when relevant (e.g., exercise) and you are in auto-mode?                          | 1. Never/rarely<br>2. Occasionally<br>3. Often<br>4. Always/almost always                                                                                                 |
| insulindosehow [if pumptype ≠ 2, 11 or 12 and bolus ≠ 4]    | When do you typically take bolus insulin for meals?                                                                                 | 1. Before the meal (10 minutes or more)<br>2. Just before the meal<br>3. During the meal<br>4. After the meal                                                             |
| missedbolus [if pumptype ≠ 2, 11 or 12 and bolus ≠ 4]       | How often do you forget bolus insulin for meals?                                                                                    | 1. Never<br>2. Once a month or less<br>3. Once a week or less<br>4. Twice a week<br>5. 3-4 times a week<br>6. 5-6 times a week<br>7. At least once a day                  |
| carbhow [if pumptype ≠ 2, 11 or 12 and bolus ≠ 4]           | How do you typically enter carbohydrates into the insulin pump?                                                                     | 1. I typically enter the estimated/calculated amount of carbohydrates<br>2. I typically enter the same amount of carbohydrates regardless of small variations in the meal |

|                                                                         |                                                                                                                                                                                                        |                                                                           |
|-------------------------------------------------------------------------|--------------------------------------------------------------------------------------------------------------------------------------------------------------------------------------------------------|---------------------------------------------------------------------------|
|                                                                         |                                                                                                                                                                                                        | 3. I never enter carbohydrates in the insulin pump                        |
| carbhow_intro [if pumptype ≠ 2, 11 or 12 and bolus ≠ 4 and carbhow ≠ 3] | How often do you do the following when entering carbohydrates into the insulin pump?<br>This does not include intake of carbohydrates at low blood sugar or as a preventative measure before exercise. |                                                                           |
| maincourse [if pumptype ≠ 2, 11 or 12 and bolus ≠ 4 and carbhow ≠ 3]    | I enter at main meals                                                                                                                                                                                  | 1. Never/rarely<br>2. Occasionally<br>3. Often<br>4. Always/almost always |
| snack1 [if pumptype ≠ 2, 11 or 12 and bolus ≠ 4 and carbhow ≠ 3]        | I enter anything over 10 g carbohydrates                                                                                                                                                               | 1. Never/rarely<br>2. Occasionally<br>3. Often<br>4. Always/almost always |
| snack2 [if pumptype ≠ 2, 11 or 12 and bolus ≠ 4 and carbhow ≠ 3]        | I enter anything over 5 g carbohydrates                                                                                                                                                                | 1. Never/rarely<br>2. Occasionally<br>3. Often<br>4. Always/almost always |
| allmeals1 [if pumptype ≠ 2, 11 or 12 and bolus ≠ 4 and carbhow ≠ 3]     | I deliberately enter more carbohydrates than the calculated amount                                                                                                                                     | 1. Never/rarely<br>2. Occasionally<br>3. Often<br>4. Always/almost always |
| allmeals2 [if pumptype ≠ 2, 11 or 12 and bolus ≠ 4 and carbhow ≠ 3]     | I deliberately enter less carbohydrates than the calculated amount                                                                                                                                     | 1. Never/rarely<br>2. Occasionally<br>3. Often<br>4. Always/almost always |

## Page 4 of 28

| Scale/item [branching logic]                                                                                                                                    | Question                                                                                                                    | Response categories                                                                                                                                                                                                                                                                                                                                                                                                                                                                                           |
|-----------------------------------------------------------------------------------------------------------------------------------------------------------------|-----------------------------------------------------------------------------------------------------------------------------|---------------------------------------------------------------------------------------------------------------------------------------------------------------------------------------------------------------------------------------------------------------------------------------------------------------------------------------------------------------------------------------------------------------------------------------------------------------------------------------------------------------|
| <b>The following questions are about how you use data upload from your insulin pump to your computer and how you adjust the functions of your insulin pump.</b> |                                                                                                                             |                                                                                                                                                                                                                                                                                                                                                                                                                                                                                                               |
| pumpdata                                                                                                                                                        | How often do you transfer data from your insulin pump to your computer?                                                     | 1. Never<br>2. Once a year or less<br>3. 2-5 times a year<br>4. Every two months<br>5. Once a month<br>6. Once a week or more often<br>7. Every day                                                                                                                                                                                                                                                                                                                                                           |
| pumpdata_why [if pumpdata = 3, 4, 5, 6 or 7]                                                                                                                    | Why do you transfer data from your insulin pump to your computer? Feel free to choose several reasons.                      | 1. So that my <u>healthcare provider</u> can analyze the development of my blood sugar and whether the insulin pump is set correctly<br>2. So that <u>I</u> can analyze the development of my blood sugar and whether the insulin pump is set correctly<br>3. Other<br>4. Do not know                                                                                                                                                                                                                         |
| Pumpdata_why_other [if pumpdata_why = 3]                                                                                                                        | For what other reasons do you transfer data from your insulin pump to your computer?                                        | Open-ended response                                                                                                                                                                                                                                                                                                                                                                                                                                                                                           |
| pumpdata_why [if pumpdata = 1 or 2]                                                                                                                             | Why do you never/rarely transfer data from your insulin pump to your computer at home? Feel free to choose several reasons. | 1. I do not own a computer<br>2. I did not know it was a possibility<br>3. I do not know how to do it<br>4. Data is too hard to understand<br>5. It takes too long<br>6. The insulin pump program is not compatible with my computer<br>7. I prefer to keep a diabetes diary<br>8. I do not find the data useful<br>9. I do not like seeing my data<br>10. I do not want to share my data with an insulin pump company<br>11. I do not feel the need to transfer data at home<br>12. Other<br>13. Do not know |
| pumpdata_whynot_other [if pumpdata_why = 12]                                                                                                                    | For what other reasons do you not transfer data from your insulin pump to your computer?                                    | Open-ended response                                                                                                                                                                                                                                                                                                                                                                                                                                                                                           |
| pumpadjust                                                                                                                                                      | Who primarily decides changes in your insulin pump's basic settings? E.g., carbohydrates, insulin sensitivity, basal rates. | 1. My healthcare provider<br>2. Myself<br>3. My next of kin                                                                                                                                                                                                                                                                                                                                                                                                                                                   |

|                                                    |                                                                                                                                           |                                                                                                                                   |
|----------------------------------------------------|-------------------------------------------------------------------------------------------------------------------------------------------|-----------------------------------------------------------------------------------------------------------------------------------|
| adjustself1 [if pumpadjust = 1]                    | Even though it is primarily your healthcare provider who decides the settings, do you do it yourself sometimes?                           | 1. Yes<br>2. No                                                                                                                   |
| adjustself2 [if pumpadjust = 2 or adjustself1 = 1] | When you adjust the basic settings of the insulin pump yourself, which ones do you typically adjust? Feel free to choose several options. | 1. Carbohydrate ratio<br>2. Insulin sensitivity<br>3. Basal rate<br>4. Insulin's duration/time of action<br>5. Target blood sugar |
| daysset                                            | How many days typically pass between you changing insulin needle/insulin catheter or pod/patch?                                           | Drop-down menu from 1 to 10 days.                                                                                                 |



## Page 5 of 28

| Scale/item [branching logic]<br>[branching logic]                                                       | Question                                                                                                                                                                           | Response categories                                                                                                                                                                                                                                                         |
|---------------------------------------------------------------------------------------------------------|------------------------------------------------------------------------------------------------------------------------------------------------------------------------------------|-----------------------------------------------------------------------------------------------------------------------------------------------------------------------------------------------------------------------------------------------------------------------------|
| <b>The following questions are about your possible use of sensor or flash glucose measuring device.</b> |                                                                                                                                                                                    |                                                                                                                                                                                                                                                                             |
| sensor                                                                                                  | Are you currently using a sensor or flash glucose meter?                                                                                                                           | 1. Yes<br>2. No                                                                                                                                                                                                                                                             |
| sensortype [if sensor = 1]                                                                              | What sensor system do you use? You will be shown a picture of the sensor system below when you click on the name of the system.                                                    | 1. Flash Libre<br>2. Guardian to 640/670G insulin pump<br>3. Minilink to Paradigm/VEO insulin pump<br>4. Guardian connect<br>5. Dexcom (G4, G5 or G6)<br>6. Eversense<br>7. Medtrum<br>8. Other                                                                             |
| bgmeasure_flash [if sensor = 1 and sensortype = 1]                                                      | How often do you typically scan your Flash Libre? (press 'menu', 'browse history' and press the down arrow to 'sensor use' on your Flash Libre to see your daily number of scans). | 1. Rarer than once a day<br>2. 1-3 times daily<br>3. 4-6 times daily<br>4. 7-9 times daily<br>5. 10 or more times a day                                                                                                                                                     |
| flash_who [if sensortype = 1]                                                                           | Who pays for your Flash Libre?                                                                                                                                                     | 1. Municipality<br>2. The hospital/region<br>3. Out-of-pocket payment<br>4. Do not know                                                                                                                                                                                     |
| sensortype_other [if sensortype = 8]                                                                    | What other sensor are you using?                                                                                                                                                   | Open-ended response                                                                                                                                                                                                                                                         |
| sensorstop [if sensor = 0]                                                                              | Have you previously used a sensor but stopped?                                                                                                                                     | 1. Yes<br>2. No                                                                                                                                                                                                                                                             |
| sensorstop_why [if sensorstop = 1]                                                                      | Why did you stop using a sensor? Feel free to choose several reasons.                                                                                                              | 1. Skin problems<br>2. Too many alarms<br>3. Technical problems (e.g., signal failure)<br>4. Not accurate enough<br>5. Annoying to wear<br>6. Attachment problems<br>7. Information overload<br>8. It was too difficult to understand and use the sensor values<br>9. Other |

|                                                  |                                                                                                                            |                                                                                                                                                                                                                                                                                                                                                                                                                                 |
|--------------------------------------------------|----------------------------------------------------------------------------------------------------------------------------|---------------------------------------------------------------------------------------------------------------------------------------------------------------------------------------------------------------------------------------------------------------------------------------------------------------------------------------------------------------------------------------------------------------------------------|
|                                                  |                                                                                                                            | 10. Do not know/do not remember                                                                                                                                                                                                                                                                                                                                                                                                 |
| sensorstop_why_other [if sensorstop_why = 9]     | What other reasons were there for you choosing to stop using a sensor?                                                     | Open-ended response                                                                                                                                                                                                                                                                                                                                                                                                             |
| bgmeasure [if sensor = 0]                        | How often do you measure your blood sugar?                                                                                 | 1. Less than once a day<br>2. 1-3 times daily<br>3. 4-6 times daily<br>4. 7-9 times daily<br>5. 10 or more times a day                                                                                                                                                                                                                                                                                                          |
| sensoryear [if sensor = 1]                       | In which year did you get your first sensor? If you do not remember the exact year, please provide an approximate estimate | Open-ended response                                                                                                                                                                                                                                                                                                                                                                                                             |
| sensorindication [if sensor = 1]                 | What was the reason for you originally being offered a sensor? Feel free to choose several reasons.                        | 1. I had too high long-term blood sugar (HbA1c)<br>2. I had severe fluctuations in my blood sugar levels<br>3. I could not feel when I had low blood sugar<br>4. I could not make blood sugar reading work at work (e.g., due to hygiene requirements)<br>5. I had problems with my fingers/hands<br>6. Other<br>7. Do not know/do not remember<br>8. I was not offered a sensor. I bought it and continue to pay for it myself |
| sensorindication_other [if sensorindication = 6] | What other reasons were there for originally being offered a sensor?                                                       | Open-ended response                                                                                                                                                                                                                                                                                                                                                                                                             |
| whysensor [if sensor = 1]                        | What was the reason(s) you initially agreed to use the sensor? Feel free to choose several reasons.                        | 1. To improve my long-term blood sugar (HbA1c)<br>2. To achieve a more stable blood sugar level (fewer fluctuations)<br>3. Because I could not feel my low blood sugar                                                                                                                                                                                                                                                          |

|                                                                             |                                                                                                               |                                                                                                                                                                                                                                                                                                          |
|-----------------------------------------------------------------------------|---------------------------------------------------------------------------------------------------------------|----------------------------------------------------------------------------------------------------------------------------------------------------------------------------------------------------------------------------------------------------------------------------------------------------------|
|                                                                             |                                                                                                               | 4. To feel more comfortable in general<br>5. I could not make blood sugar reading work at work (e.g., due to hygiene requirements)<br>6. I had problems with my fingers/hands<br>7. To achieve better sleep<br>8. To follow sensor values during exercise<br>9. Other<br>10. Do not know/do not remember |
| whysensor_other [if whysensor = 9]                                          | What other reasons were there, for you to agree to use/buy the sensor?                                        |                                                                                                                                                                                                                                                                                                          |
| sensor_no [if sensor = 1]                                                   | How many days are you without a sensor within a typical month?                                                | 1. Only when changing the sensor or short sensor problems/updates (0 days)<br>2. 1 day<br>3. 2-3 days<br>4. 4-5 days<br>5. 6-7 days<br>6. More than 7 days<br>7. Do not know                                                                                                                             |
| stoplow [if pumptype = 1, 3, 7 or 8 and sensor = 1 and pumptype ≠ 11 or 12] | Is 'stop at low' or 'stop before low' activated on your insulin pump?                                         | 1. Yes<br>2. No                                                                                                                                                                                                                                                                                          |
| trend_intro                                                                 | The following questions are about how you use the sensor's trend arrows.                                      |                                                                                                                                                                                                                                                                                                          |
| trend1 [if sensor = 1 and pumptype ≠ 11 or 12]                              | How often do you eat food without bolus if the trend arrows on your sensor show a decreasing tendency?        | 1. Never/rarely<br>2. Occasionally<br>3. Often<br>4. Always/almost always                                                                                                                                                                                                                                |
| trend2 [if sensor = 1 and pumptype ≠ 2, 11 or 12]                           | How often do you stop or reduce the basal rate if the trend arrows on your sensor show a decreasing tendency? | 1. Never/rarely<br>2. Occasionally<br>3. Often<br>4. Always/almost always                                                                                                                                                                                                                                |
| trend3 [if sensor = 1 and pumptype ≠ 2, 11 or 12]                           | How often do you use the trend arrows to take more or less than the insulin pump's suggestion for bolus?      | 1. Never/rarely<br>2. Occasionally<br>3. Often                                                                                                                                                                                                                                                           |

|                                                                       |                                                                                                                       |                                                                                                                                                                                                                                                                                                                                                                                                                                                                                                        |
|-----------------------------------------------------------------------|-----------------------------------------------------------------------------------------------------------------------|--------------------------------------------------------------------------------------------------------------------------------------------------------------------------------------------------------------------------------------------------------------------------------------------------------------------------------------------------------------------------------------------------------------------------------------------------------------------------------------------------------|
|                                                                       |                                                                                                                       | 4. Always/almost always                                                                                                                                                                                                                                                                                                                                                                                                                                                                                |
| autoupload [if sensortype = 1, 3, 4, 5 or 6 and pumptype ≠ 11 or 12.  | Do you use auto-upload via an app on your phone or tablet to read your sensor data?                                   | 1. Yes<br>2. No                                                                                                                                                                                                                                                                                                                                                                                                                                                                                        |
| sensordataupload [if autoupload = 0 and sensortype = 1, 3, 4, 5 or 6] | How often do you transfer data from your sensor to your computer?                                                     | 1. Never<br>2. Once a year or fewer<br>3. 2-5 times a year<br>4. Every two months<br>5. Once a month<br>6. Once a week or more often<br>7. Every day<br>8. Not relevant                                                                                                                                                                                                                                                                                                                                |
| sensordataupload_whynot [if sensordataupload = 1 or 2]                | Why do you never/rarely transfer data from your sensor to your computer at home? Feel free to choose several reasons. | 1. I do not have a computer<br>2. I did not know it was a possibility<br>3. I do not know how to do it<br>4. The data are too hard to understand<br>5. It takes too long<br>6. The sensor program is not compatible with my computer<br>7. I prefer to keep a diabetes diary<br>8. I do not find the data useful<br>9. I do not like seeing my data<br>10. I do not want to share my data with a sensor company<br>11. I do not feel the need to transfer data at home<br>12. Other<br>13. Do not know |
| sensordataupload_whynot_other [if sensordataupload_whynot = 12]       | What other reasons are there for you not transferring data from your sensor to your computer at home?                 | Open-ended response                                                                                                                                                                                                                                                                                                                                                                                                                                                                                    |
| sensorshare [if sensor = 1, 3, 4, 5, 6 or pumptype = 12.              | Do you share sensor data with your next of kin using the sensor's share function?                                     | 1. Yes<br>2. No                                                                                                                                                                                                                                                                                                                                                                                                                                                                                        |
| sensorshare_who [if sensorshare = 1]                                  | Which next of kin do you share your sensor data with? Feel free to choose several options.                            | 1. Spouse/significant other<br>2. Children                                                                                                                                                                                                                                                                                                                                                                                                                                                             |

|  |  |                                       |
|--|--|---------------------------------------|
|  |  | 3. Parents<br>4. Friends<br>5. Others |
|--|--|---------------------------------------|

## Page 6 of 28

| Scale/item [branching logic]                                                                                                                                                                                                                                       | Question                                                                                   | Response categories                                                                                                                                                                                                                                                                                                                                   |
|--------------------------------------------------------------------------------------------------------------------------------------------------------------------------------------------------------------------------------------------------------------------|--------------------------------------------------------------------------------------------|-------------------------------------------------------------------------------------------------------------------------------------------------------------------------------------------------------------------------------------------------------------------------------------------------------------------------------------------------------|
| <b>Think back to the teaching and guidance you received when you started your insulin pump treatment. By this we mean a course lasting a day or more in which you received information and guidance on insulin pump treatment and the use of the insulin pump.</b> |                                                                                            |                                                                                                                                                                                                                                                                                                                                                       |
| educationtime                                                                                                                                                                                                                                                      | Approximately how long t did the start-up/education last?                                  | 1. 1 day or less<br>2. 2-3 days<br>3. 3-4 days<br>4. Other<br>5. Do not remember                                                                                                                                                                                                                                                                      |
| education_other [if educationtime = 4]                                                                                                                                                                                                                             | Did the start-up/education take place over a longer or shorter period? Please be specific. | Open-ended response                                                                                                                                                                                                                                                                                                                                   |
| educationprep                                                                                                                                                                                                                                                      | How did you prepare for the insulin pump start-up? Feel free to choose several options.    | 1. I found information on the internet about insulin pump treatment<br><br>2. I talked to other insulin pump users in my network<br><br>3. I sought out groups on social media with insulin pump users<br><br>4. I did not seek out special information other than the information given to me by my health care provider<br><br>5. I do not remember |
| educationhcp                                                                                                                                                                                                                                                       | Who taught you about insulin pump start-up? Feel free to choose several options.           | 1. Representative from a pump company<br>2. Dietitian<br>3. Diabetes doctor<br>4. Diabetes nurse<br>5. I do not remember                                                                                                                                                                                                                              |
| educationt                                                                                                                                                                                                                                                         | How did the teaching take place?                                                           | 1. I received mostly group-based lessons<br>2. I received mostly individual instruction<br>3. I do not remember                                                                                                                                                                                                                                       |
| educationfam                                                                                                                                                                                                                                                       | Were your relatives invited to all or part of the education?                               | 1. Yes<br>2. No<br>3. I do not remember                                                                                                                                                                                                                                                                                                               |
| educationgroup_intro [if education = 1]                                                                                                                                                                                                                            | To what degree do you agree with the following statements?                                 |                                                                                                                                                                                                                                                                                                                                                       |
| educationgroup1 [if educationt = 1]                                                                                                                                                                                                                                | Group education suited me well                                                             | 1. Strongly disagree                                                                                                                                                                                                                                                                                                                                  |

|                                                          |                                                                                                  |                                                                                                       |
|----------------------------------------------------------|--------------------------------------------------------------------------------------------------|-------------------------------------------------------------------------------------------------------|
|                                                          |                                                                                                  | 2. Disagree<br>3. Neither agree nor disagree<br>4. Agree<br>5. Strongly agree                         |
| educationgroup2 [if educationt = 1]                      | I appreciated talking to the other participants in the group and hearing about their experiences | 1. Strongly disagree<br>2. Disagree<br>3. Neither agree nor disagree<br>4. Agree<br>5. Strongly agree |
| educationgroup3 [if educationt = 1]                      | I would have preferred individual education                                                      | 1. Strongly disagree<br>2. Disagree<br>3. Neither agree nor disagree<br>4. Agree<br>5. Strongly agree |
| educationgroup4 [if educationt = 1 and educationfam = 1] | I found it valuable that my next of kin could participate in all or part of the education        | 1. Strongly disagree<br>2. Disagree<br>3. Neither agree nor disagree<br>4. Agree<br>5. Strongly agree |
| educationind_intro [if education = 2]                    | To what degree do you agree with the following statements?                                       |                                                                                                       |
| educationind1 [if education = 2]                         | The individual education suited me well                                                          | 1. Strongly disagree<br>2. Disagree<br>3. Neither agree nor disagree<br>4. Agree<br>5. Strongly agree |
| educationind2 [if education = 2]                         | I appreciated having time with the teacher alone without other participants present              | 1. Strongly disagree<br>2. Disagree<br>3. Neither agree nor disagree<br>4. Agree<br>5. Strongly agree |
| educationind3 [if education = 2]                         | I would have preferred group training with others in the same situation                          | 1. Strongly disagree<br>2. Disagree<br>3. Neither agree nor disagree<br>4. Agree<br>5. Strongly agree |
| educationind4 [if education = 2 and educationfam = 1]    | I found it valuable that my next of kin could participate in all or part of the teaching         | 1. Strongly disagree<br>2. Disagree<br>3. Neither agree nor disagree<br>4. Agree<br>5. Strongly agree |

## Page 7 of 28

| Scale/item [branching logic]                                                                                                                  | Question                                                                                                                                                                                         | Response categories                                                                                                                                                                               |
|-----------------------------------------------------------------------------------------------------------------------------------------------|--------------------------------------------------------------------------------------------------------------------------------------------------------------------------------------------------|---------------------------------------------------------------------------------------------------------------------------------------------------------------------------------------------------|
| <b>The following questions are about the teaching or exchange of experience you have participated in as an experienced insulin pump user.</b> |                                                                                                                                                                                                  |                                                                                                                                                                                                   |
| educationnow                                                                                                                                  | Have you participated in either of these types of courses in relation to your insulin pump treatment in the past 5 years? If you have participated in both, choose the course you remember best. | 1. Carbohydrate counting course in a group<br>2. "Refresher course" experience-sharing course about insulin pump in a group<br>3. No, I have not participated in such courses in the last 5 years |
| educationgroup2intro                                                                                                                          | To what degree do you agree with the following statements?                                                                                                                                       |                                                                                                                                                                                                   |
| educationgroup21<br>[educationnow = 1 or 2]                                                                                                   | Group education suited me well                                                                                                                                                                   | 1. Strongly disagree<br>2. Disagree<br>3. Neither agree nor disagree<br>4. Agree<br>5. Strongly agree                                                                                             |
| educationgroup22<br>[educationnow = 1 or 2]                                                                                                   | I appreciated talking to the other participants in the group and hearing their experiences                                                                                                       | 1. Strongly disagree<br>2. Disagree<br>3. Neither agree nor disagree<br>4. Agree<br>5. Strongly agree                                                                                             |
| educationgroup23<br>[educationnow = 1 or 2]                                                                                                   | I would have preferred individual education                                                                                                                                                      | 1. Strongly disagree<br>2. Disagree<br>3. Neither agree nor disagree<br>4. Agree<br>5. Strongly agree                                                                                             |



## Page 8 of 28

| Scale/item<br>[branching<br>logic]                                                                                               | Question                                                                                                                                                                                                                                       | Response categories                                                      |
|----------------------------------------------------------------------------------------------------------------------------------|------------------------------------------------------------------------------------------------------------------------------------------------------------------------------------------------------------------------------------------------|--------------------------------------------------------------------------|
| <b>In the following we ask about your current needs for knowledge, education and experience-sharing about your insulin pump.</b> |                                                                                                                                                                                                                                                |                                                                          |
| knowledge1                                                                                                                       | Do you need a refresher or more knowledge about the use of the different insulin pump features?                                                                                                                                                | 1. No<br>2. Yes, to some degree<br>3. Yes, very much<br>4. I do not know |
| knowledge2                                                                                                                       | Do you need sparring and experience-sharing in relation to everyday-life with your insulin pump? Topics could be family life, sport, working life, travel, or the fact that you carry an insulin pump 24/7                                     | 1. No<br>2. Yes, to some degree<br>3. Yes, very much<br>4. I do not know |
| knowledge3                                                                                                                       | Do you need more practical knowledge of the upload and interpretation of data from your insulin pump and possible sensor? (With upload we mean transferring data to computer/app, e.g., blood glucose levels, sensor curves and insulin doses) | 1. No<br>2. Yes, to some degree<br>3. Yes, very much<br>4. I do not know |
| knowledge4                                                                                                                       | Do you need more knowledge and/or practical training in how you can adjust the insulin pump settings yourself?                                                                                                                                 | 1. No<br>2. Yes, to some degree<br>3. Yes, very much<br>4. I do not know |
| knowledge5                                                                                                                       | Do you seek out knowledge about new initiatives in insulin pump treatment on, e.g., the internet or in networks with other insulin pump users outside your place of treatment?                                                                 | 1. No<br>2. Yes, to some degree<br>3. Yes, very much<br>4. I do not know |

## Page 9 of 28

| Scale/item [branching logic]                               | Question                                                                             | Response categories                                                                                                                                                                        |
|------------------------------------------------------------|--------------------------------------------------------------------------------------|--------------------------------------------------------------------------------------------------------------------------------------------------------------------------------------------|
| <b>The next questions are about carbohydrate counting.</b> |                                                                                      |                                                                                                                                                                                            |
| carbcount                                                  | Do you count carbohydrates?                                                          | 1. Yes<br>2. No                                                                                                                                                                            |
| carbcount_whynot [if carbcount = 2]                        | Why do you not count carbohydrates? Feel free to choose several reasons.             | 1. I never learned it<br>2. It is too much of a hassle<br>3. I lack training/practice in it<br>4. I do not feel that I need it<br>5. Other reasons<br>6. I do not know                     |
| carbcount_whynot_other [if carbcount_whynot = 5]           | What other reasons are there for you not counting carbohydrates?                     | Open-ended response                                                                                                                                                                        |
| carbcounthow [if carbcount = 1]                            | What methods do you use to count carbohydrates? Feel free to choose several methods. | 1. I eyeball<br>2. I use weight<br>3. I use an app<br>4. I use nutrition fact declarations<br>5. I use encyclopedias (e.g., carbohydrate lists)<br>6. I use Google<br>7. None of the above |
| carbcountlearn [if carbcount = 1]                          | How did you learn to count carbohydrates? Feel free to choose several reasons.       | 1. Individual guidance from dietitian<br>2. Carbohydrate counting course<br>3. Self-taught (e.g., from books, social media or experience-sharing with others)                              |

|                                                   |                                                                                                                                                                                                                                                                                                                                                                                                                                                                                                                                                                                                                                                                                                                     |                                                                                                                            |
|---------------------------------------------------|---------------------------------------------------------------------------------------------------------------------------------------------------------------------------------------------------------------------------------------------------------------------------------------------------------------------------------------------------------------------------------------------------------------------------------------------------------------------------------------------------------------------------------------------------------------------------------------------------------------------------------------------------------------------------------------------------------------------|----------------------------------------------------------------------------------------------------------------------------|
|                                                   |                                                                                                                                                                                                                                                                                                                                                                                                                                                                                                                                                                                                                                                                                                                     | 4. None of the above                                                                                                       |
| carbcount_intro                                   | <p>You now have the opportunity to participate in a carbohydrate counting challenge.</p> <p>If you eat the following food items occasionally or often, you will be shown a picture of different portion sizes for the given item. You must then pick the portion size you typically eat and state the amount of carbohydrates you think it contains. The rules are simple: you cannot use aids such as carbohydrate lists, apps, or nutrition fact declarations. The idea is that you simply respond based on your immediate assessment of carbohydrate content in each item.</p> <p>On the last page of the questionnaire, you can compare your response with the actual amount of carbohydrates in each food.</p> | 1. I would like to participate<br>2. I do not want to take part in the challenge                                           |
| choco1 [if carbcount = 1 and carbcount_intro = 1] | How often do you eat dark chocolate?                                                                                                                                                                                                                                                                                                                                                                                                                                                                                                                                                                                                                                                                                | 1. Rarely/Never<br>2. Occasionally<br>3. Often                                                                             |
| choco2 [if choco1 = 2 or 3]                       | Select the image that matches the portion size you typically eat. If you typically eat a larger or smaller portion than any of the shown, select the image that comes closest.                                                                                                                                                                                                                                                                                                                                                                                                                                                                                                                                      | 1. Portion size A<br>2. Portion size B<br>3. Portion size C<br>4. Portion size D<br>5. Portion size E<br>6. Portion size F |
| choco3 [if choco1 = 2 or 3]                       | 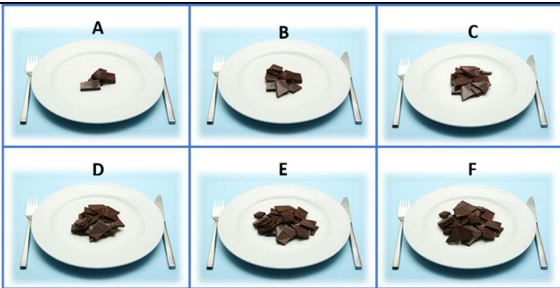                                                                                                                                                                                                                                                                                                                                                                                                                                                                                                                                                                                                                                |                                                                                                                            |
| choco4 [if choco2 ≠ .]                            | Type the amount of carbohydrates (in grams) that are on the image you have selected.                                                                                                                                                                                                                                                                                                                                                                                                                                                                                                                                                                                                                                | Open-ended response                                                                                                        |
| pasta1 [if choco1 = 1 or choco4 ≠ .]              | How often do you eat pasta?                                                                                                                                                                                                                                                                                                                                                                                                                                                                                                                                                                                                                                                                                         | 1. Rarely/Never<br>2. Occasionally<br>3. Often                                                                             |
| pasta2 [if pasta1 = 2 or 3]                       | Select the image that matches the portion size you typically eat. If you typically eat a larger or smaller portion than any of the shown, select the image that comes closest.                                                                                                                                                                                                                                                                                                                                                                                                                                                                                                                                      | 1. Portion size A<br>2. Portion size B<br>3. Portion size C<br>4. Portion size D<br>5. Portion size E<br>6. Portion size F |

|                                       |                                                                                                                                                                                |                                                                                                                            |
|---------------------------------------|--------------------------------------------------------------------------------------------------------------------------------------------------------------------------------|----------------------------------------------------------------------------------------------------------------------------|
| pasta3 [if pasta1 = 2 or 3]           | 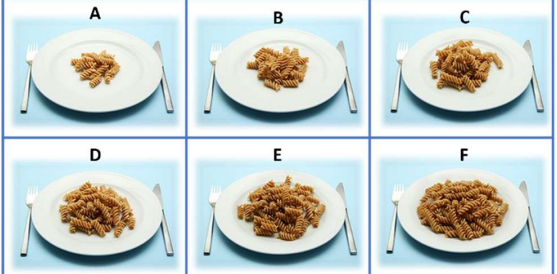                                                                                             |                                                                                                                            |
| pasta4 [if pasta2 ≠ .]                | Type the amount of carbohydrates (in grams) that are on the image you have selected.                                                                                           | Open-ended response                                                                                                        |
| grapes1 [if pasta1 = 1 or pasta4 ≠ .] | How often do you eat grapes?                                                                                                                                                   | 1. Rarely/Never<br>2. Occasionally<br>3. Often                                                                             |
| grapes2 [if grapes1 = 2 or 3]         | Select the image that matches the portion size you typically eat. If you typically eat a larger or smaller portion than any of the shown, select the image that comes closest. | 1. Portion size A<br>2. Portion size B<br>3. Portion size C<br>4. Portion size D<br>5. Portion size E<br>6. Portion size F |
| grapes3 [if grapes1 = 2 or 3]         |                                                                                            |                                                                                                                            |
| grapes4 [if grapes2 ≠ .]              | Type the amount of carbohydrates (in grams) that are on the image you have selected.                                                                                           | Open-ended response                                                                                                        |
| bun1 [if grapes1 = 1 or grapes4 ≠ .]  | How often do you eat wholegrain bread rolls?                                                                                                                                   | 1. Rarely/Never<br>2. Occasionally<br>3. Often                                                                             |
| bun2 [if bun1 = 2 or 3]               | Select the image that matches the portion size you typically eat. If you typically eat a larger or smaller portion than any of the shown, select the image that comes closest. | 1. Portion size A<br>2. Portion size B<br>3. Portion size C<br>4. Portion size D<br>5. Portion size E                      |

|                                |                                                                                                                                                                                                                                                                                                                                                                                                                                                                                                                                                                                                                                                                                                                                                                                                                             |                            |
|--------------------------------|-----------------------------------------------------------------------------------------------------------------------------------------------------------------------------------------------------------------------------------------------------------------------------------------------------------------------------------------------------------------------------------------------------------------------------------------------------------------------------------------------------------------------------------------------------------------------------------------------------------------------------------------------------------------------------------------------------------------------------------------------------------------------------------------------------------------------------|----------------------------|
| <p>bun3 [if bun1 = 2 or 3]</p> | <div data-bbox="547 409 1110 692"> <div data-bbox="547 409 735 546"> <p>A<br/>vægt<br/>40 g</p>  </div> <div data-bbox="735 409 922 546"> <p>B<br/>vægt<br/>60 g</p>  </div> <div data-bbox="922 409 1110 546"> <p>C<br/>vægt<br/>80 g</p>  </div> <div data-bbox="547 546 735 692"> <p>D<br/>vægt<br/>100 g</p>  </div> <div data-bbox="735 546 922 692"> <p>E<br/>vægt<br/>140 g</p>  </div> </div> |                            |
| <p>bun4 [if bun2 ≠ .]</p>      | <p>Type the amount of carbohydrates (in grams) that are on the image you have selected.</p>                                                                                                                                                                                                                                                                                                                                                                                                                                                                                                                                                                                                                                                                                                                                 | <p>Open-ended response</p> |

## Page 10 of 28

| Scale/item [branching logic]                                                                                                                                                                                                   | Question                                            | Response categories                                                                |
|--------------------------------------------------------------------------------------------------------------------------------------------------------------------------------------------------------------------------------|-----------------------------------------------------|------------------------------------------------------------------------------------|
| <b>The following statements are about your satisfaction with your current insulin pump. Think about your everyday life with the pump and indicate the degree to which you agree or disagree with the following statements.</b> |                                                     |                                                                                    |
| <b>My insulin pump ...</b>                                                                                                                                                                                                     |                                                     |                                                                                    |
| ids1                                                                                                                                                                                                                           | ... helps me to feel more in control of my diabetes | 1. Strongly disagree<br>2. Disagree<br>3. Neutral<br>4. Agree<br>5. Strongly agree |
| ids2                                                                                                                                                                                                                           | ... works well when I need it                       | 1. Strongly disagree<br>2. Disagree<br>3. Neutral<br>4. Agree<br>5. Strongly agree |
| ids3                                                                                                                                                                                                                           | ... does not really benefit me much                 | 1. Strongly disagree<br>2. Disagree<br>3. Neutral<br>4. Agree<br>5. Strongly agree |
| ids4                                                                                                                                                                                                                           | ... helps me feel more positive about the future    | 1. Strongly disagree<br>2. Disagree<br>3. Neutral<br>4. Agree<br>5. Strongly agree |
| ids5                                                                                                                                                                                                                           | ... helps me to have good blood glucose control     | 1. Strongly disagree<br>2. Disagree<br>3. Neutral<br>4. Agree<br>5. Strongly agree |
| ids6                                                                                                                                                                                                                           | ... is too complicated                              | 1. Strongly disagree<br>2. Disagree<br>3. Neutral<br>4. Agree<br>5. Strongly agree |
| ids7                                                                                                                                                                                                                           | ... is too much of a hassle to use                  | 1. Strongly disagree<br>2. Disagree<br>3. Neutral<br>4. Agree<br>5. Strongly agree |
| ids8                                                                                                                                                                                                                           | ... has too many pieces and parts to manage         | 1. Strongly disagree<br>2. Disagree<br>3. Neutral<br>4. Agree                      |

|       |                                                               |                                                                                    |
|-------|---------------------------------------------------------------|------------------------------------------------------------------------------------|
|       |                                                               | 5. Strongly agree                                                                  |
| ids9  | ... takes too much time to use                                | 1. Strongly disagree<br>2. Disagree<br>3. Neutral<br>4. Agree<br>5. Strongly agree |
| ids10 | ... is often embarrassing to use when I am in public          | 1. Strongly disagree<br>2. Disagree<br>3. Neutral<br>4. Agree<br>5. Strongly agree |
| ids11 | ... makes it difficult to be as spontaneous as I'd like to be | 1. Strongly disagree<br>2. Disagree<br>3. Neutral<br>4. Agree<br>5. Strongly agree |
| ids12 | ... is inconvenient to use when I am away from home           | 1. Strongly disagree<br>2. Disagree<br>3. Neutral<br>4. Agree<br>5. Strongly agree |
| ids13 | ... is a hassle to carry around                               | 1. Strongly disagree<br>2. Disagree<br>3. Neutral<br>4. Agree<br>5. Strongly agree |

## Page 11 of 28

| Scale/item [branching logic]                                                                                                                                                                                                                                                                           | Question                                                                    | Response categories                                                                |
|--------------------------------------------------------------------------------------------------------------------------------------------------------------------------------------------------------------------------------------------------------------------------------------------------------|-----------------------------------------------------------------------------|------------------------------------------------------------------------------------|
| <b>The following statements concern your satisfaction with your current glucose meter (e.g., blood glucose monitor or sensor). Base your answer on the meter you use the most or consider your primary meter and indicate the degree to which you agree or disagree with the following statements.</b> |                                                                             |                                                                                    |
| devicetype                                                                                                                                                                                                                                                                                             | Please specify which glucose meter you are basing your answers on?          | 1. Sensor or Flash glucose meter<br>2. Blood sugar device                          |
| gmss_intro                                                                                                                                                                                                                                                                                             | My current blood glucose monitor/sensor ...                                 |                                                                                    |
| gmss1                                                                                                                                                                                                                                                                                                  | ... helps me feel more satisfied with how things are going with my diabetes | 1. Strongly disagree<br>2. Disagree<br>3. Neutral<br>4. Agree<br>5. Strongly agree |
| gmss2                                                                                                                                                                                                                                                                                                  | ... makes me think about diabetes more than I want to                       | 1. Strongly disagree<br>2. Disagree<br>3. Neutral<br>4. Agree<br>5. Strongly agree |
| gmss3                                                                                                                                                                                                                                                                                                  | ... takes too much time to use                                              | 1. Strongly disagree<br>2. Disagree<br>3. Neutral<br>4. Agree<br>5. Strongly agree |
| gmss4                                                                                                                                                                                                                                                                                                  | ... doesn't seem to be as accurate as I would like it to be                 | 1. Strongly disagree<br>2. Disagree<br>3. Neutral<br>4. Agree<br>5. Strongly agree |
| gmss5                                                                                                                                                                                                                                                                                                  | ... makes me worry a lot                                                    | 1. Strongly disagree<br>2. Disagree<br>3. Neutral<br>4. Agree<br>5. Strongly agree |
| gmss6                                                                                                                                                                                                                                                                                                  | ... is too much of a hassle to use                                          | 1. Strongly disagree<br>2. Disagree<br>3. Neutral<br>4. Agree<br>5. Strongly agree |
| gmss7                                                                                                                                                                                                                                                                                                  | ... gives me numbers that I don't entirely trust                            | 1. Strongly disagree<br>2. Disagree<br>3. Neutral<br>4. Agree<br>5. Strongly agree |



|        |                                                         |                                                                                    |
|--------|---------------------------------------------------------|------------------------------------------------------------------------------------|
| gmss8  | ... helps me feel less restricted by diabetes           | 1. Strongly disagree<br>2. Disagree<br>3. Neutral<br>4. Agree<br>5. Strongly agree |
| gmss9  | ... makes me feel more frustrated with my diabetes      | 1. Strongly disagree<br>2. Disagree<br>3. Neutral<br>4. Agree<br>5. Strongly agree |
| gmss10 | ... helps me to be more spontaneous in daily life       | 1. Strongly disagree<br>2. Disagree<br>3. Neutral<br>4. Agree<br>5. Strongly agree |
| gmss11 | ... Causes too many skin irritations or bruises         | 1. Strongly disagree<br>2. Disagree<br>3. Neutral<br>4. Agree<br>5. Strongly agree |
| gmss12 | ... often gives me results that don't make sense        | 1. Strongly disagree<br>2. Disagree<br>3. Neutral<br>4. Agree<br>5. Strongly agree |
| gmss13 | ... makes me feel more down and depressed               | 1. Strongly disagree<br>2. Disagree<br>3. Neutral<br>4. Agree<br>5. Strongly agree |
| gmss14 | ... helps me to be more open to new experiences in life | 1. Strongly disagree<br>2. Disagree<br>3. Neutral<br>4. Agree<br>5. Strongly agree |
| gmss15 | ... is too painful to use                               | 1. Strongly disagree<br>2. Disagree<br>3. Neutral<br>4. Agree<br>5. Strongly agree |

## Page 12 of 28

| Scale/item [branching logic]                                                           | Question                                                                                        | Response categories                                                                                   |
|----------------------------------------------------------------------------------------|-------------------------------------------------------------------------------------------------|-------------------------------------------------------------------------------------------------------|
| <b>We would like to know how you experience wearing the insulin pump on your body.</b> |                                                                                                 |                                                                                                       |
| bodyimageintro1                                                                        | <b>Please indicate the degree to which you agree or disagree with the following statements:</b> |                                                                                                       |
| bodyimage1                                                                             | The insulin pump makes me feel me different in the eyes of others                               | 1. Strongly disagree<br>2. Disagree<br>3. Neither disagree nor agree<br>4. Agree<br>5. Strongly agree |
| bodyimage2                                                                             | It bothers me that I always have an insulin catheter in my body                                 | 1. Strongly disagree<br>2. Disagree<br>3. Neither disagree nor agree<br>4. Agree<br>5. Strongly agree |
| bodyimage3                                                                             | With the insulin pump, others immediately notice that I have diabetes                           | 1. Strongly disagree<br>2. Disagree<br>3. Neither disagree nor agree<br>4. Agree<br>5. Strongly agree |
| bodyimage4                                                                             | The insulin pump makes me less attractive                                                       | 1. Strongly disagree<br>2. Disagree<br>3. Neither disagree nor agree<br>4. Agree<br>5. Strongly agree |
| bodyimageintro2                                                                        | <b>Please indicate the degree to which you agree or disagree with the following statements:</b> |                                                                                                       |
| bodyimage5                                                                             | The insulin pump bothers me when I sleep                                                        | 1. Strongly disagree<br>2. Disagree<br>3. Neither disagree nor agree<br>4. Agree<br>5. Strongly agree |
| bodyimage6                                                                             | The insulin pump bothers me when I exercise                                                     | 1. Strongly disagree<br>2. Disagree<br>3. Neither disagree nor agree<br>4. Agree<br>5. Strongly agree |
| bodyimage7                                                                             | The insulin pump bothers me when I have sex                                                     | 1. Strongly disagree<br>2. Disagree                                                                   |

|            |                                                                               |                                                                                                          |
|------------|-------------------------------------------------------------------------------|----------------------------------------------------------------------------------------------------------|
|            |                                                                               | 3. Neither disagree<br>nor agree<br>4. Agree<br>5. Strongly agree                                        |
| bodyimage8 | The insulin pump prohibits me from wearing the clothes<br>that I want to wear | 1. Strongly disagree<br>2. Disagree<br>3. Neither disagree<br>nor agree<br>4. Agree<br>5. Strongly agree |

## Page 13 of 28

| Scale/item<br>[branching<br>logic]                                                                                                         | Question                                                                                                                                                                                                   | Response<br>categories                                                                                                                                                                                                              |
|--------------------------------------------------------------------------------------------------------------------------------------------|------------------------------------------------------------------------------------------------------------------------------------------------------------------------------------------------------------|-------------------------------------------------------------------------------------------------------------------------------------------------------------------------------------------------------------------------------------|
| <b>In the following, we ask about your general health behavior, including exercise, diet and alcohol habits as well as smoking status.</b> |                                                                                                                                                                                                            |                                                                                                                                                                                                                                     |
| exercise1                                                                                                                                  | In a normal week, how much time do you spend doing physical activities that cause you to be short of breath (e.g., running, gymnastics, or ball games)?                                                    | 1. 0 minutes / No time<br>2. Less than 30 minutes<br>3. 30-60 minutes (0.5-1 hour)<br>4. 60-90 minutes (1-1.5 hours)<br>5. 90-120 minutes (1.5-2 hours)<br>6. 120-150 minutes (2-2.5 hours)<br>7. More than 150 minutes             |
| exercise2                                                                                                                                  | In a normal week, how much time do you spend doing everyday exercise (e.g., walking, cycling or manual labor)?                                                                                             | 1. 0 minutes / No time<br>2. Less than 30 minutes<br>3. 30-60 minutes (0.5-1 hour)<br>4. 60-90 minutes (1-1.5 hours)<br>5. 90-150 minutes (1.5-2.5 hours)<br>6. 150-300 minutes (2.5-5 hours)<br>7. More than 300 minutes (5 hours) |
| exercise3                                                                                                                                  | How much time do you spend sitting down on a regular day when sleep is not included?                                                                                                                       | 1. Pretty much all day<br>2. 13-15 hours<br>3. 10-12 hours<br>4. 7-9 hours<br>5. 4-6 hours<br>6. 1-3 hours<br>7. No time                                                                                                            |
| diet1                                                                                                                                      | How many vegetables do you eat (raw or prepared)?<br><br>Think in servings, e.g., a carrot or 100 g fried vegetables. If you eat both a carrot and 100 g of fried vegetables, you have eaten two servings. | 1. 6 a day or more<br>2. 5-6 a day<br>3. 3-4 a day<br>4. 1-2 a day<br>5. 5-6 a week                                                                                                                                                 |

|         |                                                                                                                                                                                                                                                                                             |                                                                                                                                                                            |
|---------|---------------------------------------------------------------------------------------------------------------------------------------------------------------------------------------------------------------------------------------------------------------------------------------------|----------------------------------------------------------------------------------------------------------------------------------------------------------------------------|
|         |                                                                                                                                                                                                                                                                                             | 6. 3-4 a week<br>7. 1-2 a week<br>8. Fewer or none                                                                                                                         |
| diet2   | How much fruit do you eat?<br><br>Think in servings, e.g., an apple or 10 grapes.                                                                                                                                                                                                           | 1. 6 a day or more<br>2. 5-6 a day<br>3. 3-4 a day<br>4. 1-2 a day<br>5. 5-6 a week<br>6. 3-4 a week<br>7. 1-2 a week<br>8. Fewer or none                                  |
| diet3   | How often do you eat whole grains?<br><br>Whole grain foods include, e.g., oatmeal, rye bread, whole grain bread or whole grain pasta.                                                                                                                                                      | 1. More than 2 times a day<br>2. 1-2 times a day<br>3. 4-6 times a week<br>4. 1-3 times a week<br>5. Rarely or never                                                       |
| diet4   | How often do you eat fish (fresh, prepared, or canned)?                                                                                                                                                                                                                                     | 1. More than once a day<br>2. 5-7 times a week<br>3. 3-4 times a week<br>4. 1-2 times a week<br>5. Rarely or never                                                         |
| diet5   | Do you follow The Danish Health Authority's recommendation to eat less saturated fat and choose plant oil instead?<br><br>Recommendation: Choose lean meat and lean dairy products, and limit the amount of butter, whole-fat cheeses and cream. Use plant oil/liquid margarine in cooking. | 1. Almost always<br>2. Usually<br>3. Occasionally<br>4. Rarely<br>5. Never                                                                                                 |
| diet6   | To the best of your knowledge, how often does is your intake of fast carbohydrates in the form of, e.g., candy, cake, ice cream and other sweets so great that it causes a prolonged blood sugar increase?                                                                                  | 1. Never or very rarely<br>2. Rarely (about once a month)<br>3. Occasionally (a few times a month)<br>4. Often (1-2 times a week)<br>5. Very often (daily or almost daily) |
| alcohol | How much beer, wine, and/or spirits do you drink on average per week? Please reply in units of alcohol (1 unit equals, e.g., 1 beer, 1 glass of wine, 1 schnapps or 1 shot).                                                                                                                | 1. I do not drink<br>2. 1-7 units<br>3. 8-14 units<br>4. 14-21 units<br>5. More than 21 units                                                                              |
| smoking | Do you smoke?                                                                                                                                                                                                                                                                               | 1. No                                                                                                                                                                      |

|  |  |                                                           |
|--|--|-----------------------------------------------------------|
|  |  | 2. Yes, daily<br>3. Yes, occasionally<br>4. Former smoker |
|--|--|-----------------------------------------------------------|

## Page 14 of 28

| Scale/item<br>[branching logic]                                                                                                                                                 | Question                                                                                                                                                                                                                                                                                                          | Response<br>categories                                                |
|---------------------------------------------------------------------------------------------------------------------------------------------------------------------------------|-------------------------------------------------------------------------------------------------------------------------------------------------------------------------------------------------------------------------------------------------------------------------------------------------------------------|-----------------------------------------------------------------------|
| <b>The next questions are about low blood sugars. We would like to stress that your responses to the following questions will not be shared with your health care provider.</b> |                                                                                                                                                                                                                                                                                                                   |                                                                       |
| hypobehavior_intro                                                                                                                                                              | Here are five statements about things people with diabetes sometimes do to avoid low blood sugar and consequences of it. Please specify what you have done the last month in your everyday life to AVOID low blood sugar and its effects.<br><br>To avoid low blood sugar and the repercussions of it, I have ... |                                                                       |
| hypob1                                                                                                                                                                          | ... limited my out of town travel                                                                                                                                                                                                                                                                                 | 1. Never<br>2. Rarely<br>3. Sometimes<br>4. Often<br>5. Almost always |
| hypob2                                                                                                                                                                          | ... avoided visiting friends                                                                                                                                                                                                                                                                                      | 1. Never<br>2. Rarely<br>3. Sometimes<br>4. Often<br>5. Almost always |
| hypob3                                                                                                                                                                          | ... made sure there were other people around                                                                                                                                                                                                                                                                      | 1. Never<br>2. Rarely<br>3. Sometimes<br>4. Often<br>5. Almost always |
| hypob4                                                                                                                                                                          | ... kept my blood sugar higher than usual in social situations                                                                                                                                                                                                                                                    | 1. Never<br>2. Rarely<br>3. Sometimes<br>4. Often<br>5. Almost always |
| hypob5                                                                                                                                                                          | ... kept my blood sugar higher than usual while doing important tasks                                                                                                                                                                                                                                             | 1. Never<br>2. Rarely<br>3. Sometimes<br>4. Often<br>5. Almost always |
| hypoworry_intro                                                                                                                                                                 | Here are six statements about concerns that people with diabetes sometimes have due to low blood sugar.<br><br>Please indicate how often during the past month you have been CONCERNED about each statement due to low blood sugar.                                                                               |                                                                       |

|        |                                                                     |                                                                          |
|--------|---------------------------------------------------------------------|--------------------------------------------------------------------------|
|        | Because my blood sugar could drop, I was worried about ...          |                                                                          |
| hypow1 | ... not to recognizing I was having a low blood sugar               | 1. Never<br>2. Rarely<br>3. Sometimes<br>4. Often<br>5. Almost<br>always |
| hypow2 | ... passing out in public                                           | 1. Never<br>2. Rarely<br>3. Sometimes<br>4. Often<br>5. Almost<br>always |
| hypow3 | ... having a hypoglycemic episode while driving                     | 1. Never<br>2. Rarely<br>3. Sometimes<br>4. Often<br>5. Almost<br>always |
| hypow4 | ... low blood glucose interfering with important things I was doing | 1. Never<br>2. Rarely<br>3. Sometimes<br>4. Often<br>5. Almost<br>always |
| hypow5 | ... becoming hypoglycemic during sleep                              | 1. Never<br>2. Rarely<br>3. Sometimes<br>4. Often<br>5. Almost<br>always |
| hypow6 | ... getting emotionally upset and difficult to deal with            | 1. Never<br>2. Rarely<br>3. Sometimes<br>4. Often<br>5. Almost<br>always |



## Page 15 of 28

| Scale/item<br>[branching logic]                                                                                                                                                                                                                                        | Question                                                                           | Response categories                                                                                                                                    |
|------------------------------------------------------------------------------------------------------------------------------------------------------------------------------------------------------------------------------------------------------------------------|------------------------------------------------------------------------------------|--------------------------------------------------------------------------------------------------------------------------------------------------------|
| <p><b>Below is a list of statements about various forms of concern that many people with type 1 diabetes experience.</b></p> <p><b>We ask you to assess the extent to which each of the following statements has been a problem for you within the past month.</b></p> |                                                                                    |                                                                                                                                                        |
| dds1                                                                                                                                                                                                                                                                   | Feeling that I am not as skilled at managing diabetes as I should be               | 1. Not a problem<br>2. A slight problem<br>3. A moderate problem<br>4. A somewhat serious problem<br>5. A serious problem<br>6. A very serious problem |
| dds2                                                                                                                                                                                                                                                                   | Feeling that I don't eat as carefully as I probably should                         | 1. Not a problem<br>2. A slight problem<br>3. A moderate problem<br>4. A somewhat serious problem<br>5. A serious problem<br>6. A very serious problem |
| dds3                                                                                                                                                                                                                                                                   | Feeling that I don't notice the warning signs of hypoglycemia as well as I used to | 1. Not a problem<br>2. A slight problem<br>3. A moderate problem<br>4. A somewhat serious problem<br>5. A serious problem<br>6. A very serious problem |
| dds4                                                                                                                                                                                                                                                                   | Feeling that people treat me differently when they find out I have diabetes        | 1. Not a problem<br>2. A slight problem<br>3. A moderate problem<br>4. A somewhat serious problem<br>5. A serious problem<br>6. A very serious problem |
| dds5                                                                                                                                                                                                                                                                   | Feeling discouraged when I see high blood glucose numbers that I can't explain     | 1. Not a problem<br>2. A slight problem                                                                                                                |

|       |                                                                                        |                                                                                                                                                        |
|-------|----------------------------------------------------------------------------------------|--------------------------------------------------------------------------------------------------------------------------------------------------------|
|       |                                                                                        | 3. A moderate problem<br>4. A somewhat serious problem<br>5. A serious problem<br>6. A very serious problem                                            |
| dds6  | Feeling that my family and friends make a bigger deal out of diabetes than they should | 1. Not a problem<br>2. A slight problem<br>3. A moderate problem<br>4. A somewhat serious problem<br>5. A serious problem<br>6. A very serious problem |
| dds7  | Feeling that I can't tell my diabetes doctor what is really on my mind                 | 1. Not a problem<br>2. A slight problem<br>3. A moderate problem<br>4. A somewhat serious problem<br>5. A serious problem<br>6. A very serious problem |
| dds8  | Feeling that I am not taking as much insulin as I should                               | 1. Not a problem<br>2. A slight problem<br>3. A moderate problem<br>4. A somewhat serious problem<br>5. A serious problem<br>6. A very serious problem |
| dds9  | Feeling that there is too much diabetes equipment and stuff I must always have with me | 1. Not a problem<br>2. A slight problem<br>3. A moderate problem<br>4. A somewhat serious problem<br>5. A serious problem<br>6. A very serious problem |
| dds10 | Feeling like I have to hide my diabetes from other people                              | 1. Not a problem<br>2. A slight problem<br>3. A moderate problem                                                                                       |

|       |                                                                                               |                                                                                                                                                        |
|-------|-----------------------------------------------------------------------------------------------|--------------------------------------------------------------------------------------------------------------------------------------------------------|
|       |                                                                                               | 4. A somewhat serious problem<br>5. A serious problem<br>6. A very serious problem                                                                     |
| dds11 | Feeling that my friends and family worry more about hypoglycemia than I want them to          | 1. Not a problem<br>2. A slight problem<br>3. A moderate problem<br>4. A somewhat serious problem<br>5. A serious problem<br>6. A very serious problem |
| dds12 | Feeling that I don't check my blood glucose level as often as I probably should               | 1. Not a problem<br>2. A slight problem<br>3. A moderate problem<br>4. A somewhat serious problem<br>5. A serious problem<br>6. A very serious problem |
| dds13 | Feeling worried that I will develop serious long-term complications, no matter how hard I try | 1. Not a problem<br>2. A slight problem<br>3. A moderate problem<br>4. A somewhat serious problem<br>5. A serious problem<br>6. A very serious problem |
| dds14 | Feeling that I don't get help I really need from my diabetes doctor about managing diabetes   | 1. Not a problem<br>2. A slight problem<br>3. A moderate problem<br>4. A somewhat serious problem<br>5. A serious problem<br>6. A very serious problem |
| dds15 | Feeling frightened that I could have a serious hypoglycemic event when I'm asleep             | 1. Not a problem<br>2. A slight problem<br>3. A moderate problem<br>4. A somewhat serious problem<br>5. A serious problem                              |

|       |                                                                                                 |                                                                                                                                                        |
|-------|-------------------------------------------------------------------------------------------------|--------------------------------------------------------------------------------------------------------------------------------------------------------|
|       |                                                                                                 | 6. A very serious problem                                                                                                                              |
| dds16 | Feeling that thoughts about food and eating control my life                                     | 1. Not a problem<br>2. A slight problem<br>3. A moderate problem<br>4. A somewhat serious problem<br>5. A serious problem<br>6. A very serious problem |
| dds17 | Feeling that my friends or family treat me as if I were more fragile or sicker than I really am | 1. Not a problem<br>2. A slight problem<br>3. A moderate problem<br>4. A somewhat serious problem<br>5. A serious problem<br>6. A very serious problem |
| dds18 | Feeling that my diabetes doctor doesn't really understand what it's like to have diabetes       | 1. Not a problem<br>2. A slight problem<br>3. A moderate problem<br>4. A somewhat serious problem<br>5. A serious problem<br>6. A very serious problem |
| dds19 | Feeling concerned that diabetes may make me less attractive to employers                        | 1. Not a problem<br>2. A slight problem<br>3. A moderate problem<br>4. A somewhat serious problem<br>5. A serious problem<br>6. A very serious problem |
| dds20 | Feeling that my friends or family act like "diabetes police" (bother me too much)               | 1. Not a problem<br>2. A slight problem<br>3. A moderate problem<br>4. A somewhat serious problem<br>5. A serious problem<br>6. A very serious problem |

|       |                                                                                      |                                                                                                                                                        |
|-------|--------------------------------------------------------------------------------------|--------------------------------------------------------------------------------------------------------------------------------------------------------|
| dds21 | Feeling that I've got to be perfect with my diabetes management                      | 1. Not a problem<br>2. A slight problem<br>3. A moderate problem<br>4. A somewhat serious problem<br>5. A serious problem<br>6. A very serious problem |
| dds22 | Feeling frightened that I could have a serious hypoglycemic event while driving      | 1. Not a problem<br>2. A slight problem<br>3. A moderate problem<br>4. A somewhat serious problem<br>5. A serious problem<br>6. A very serious problem |
| dds23 | Feeling that my eating is out of control                                             | 1. Not a problem<br>2. A slight problem<br>3. A moderate problem<br>4. A somewhat serious problem<br>5. A serious problem<br>6. A very serious problem |
| dds24 | Feeling that people will think less of me if they knew I had diabetes                | 1. Not a problem<br>2. A slight problem<br>3. A moderate problem<br>4. A somewhat serious problem<br>5. A serious problem<br>6. A very serious problem |
| dds25 | Feeling that no matter how hard I try with my diabetes, it will never be good enough | 1. Not a problem<br>2. A slight problem<br>3. A moderate problem<br>4. A somewhat serious problem<br>5. A serious problem<br>6. A very serious problem |
| dds26 | Feeling that my diabetes doctor doesn't know enough about diabetes and diabetes care | 1. Not a problem<br>2. A slight problem                                                                                                                |

|       |                                                                                        |                                                                                                                                                        |
|-------|----------------------------------------------------------------------------------------|--------------------------------------------------------------------------------------------------------------------------------------------------------|
|       |                                                                                        | 3. A moderate problem<br>4. A somewhat serious problem<br>5. A serious problem<br>6. A very serious problem                                            |
| dds27 | Feeling that I can't ever be safe from the possibility of a serious hypoglycemic event | 1. Not a problem<br>2. A slight problem<br>3. A moderate problem<br>4. A somewhat serious problem<br>5. A serious problem<br>6. A very serious problem |
| dds28 | Feeling that I don't give my diabetes as much attention as I probably should           | 1. Not a problem<br>2. A slight problem<br>3. A moderate problem<br>4. A somewhat serious problem<br>5. A serious problem<br>6. A very serious problem |
| dds29 | Feeling that I can't do my job because of my diabetes                                  | 1. Not a problem<br>2. A slight problem<br>3. A moderate problem<br>4. A somewhat serious problem<br>5. A serious problem<br>6. A very serious problem |

## Page 16 of 28

| Scale/item<br>[branching logic]                                                                                | Question                                                                         | Response categories                                                                                                             |
|----------------------------------------------------------------------------------------------------------------|----------------------------------------------------------------------------------|---------------------------------------------------------------------------------------------------------------------------------|
| <b>How supportive have the following people been in helping you to manage your diabetes in the past month?</b> |                                                                                  |                                                                                                                                 |
| sos1                                                                                                           | Your family                                                                      | 1. Not supportive<br>2. Somewhat supportive<br>3. Very supportive<br>4. Do not have these (not relevant with support from here) |
| sos2                                                                                                           | Friends or other people close to you                                             | 1. Not supportive<br>2. Somewhat supportive<br>3. Very supportive<br>4. Do not have these (not relevant with support from here) |
| sos3                                                                                                           | People at your place of work or study                                            | 1. Not supportive<br>2. Somewhat supportive<br>3. Very supportive<br>4. Do not have these (not relevant with support from here) |
| sos4                                                                                                           | Your diabetes healthcare provider                                                | 1. Not supportive<br>2. Somewhat supportive<br>3. Very supportive<br>4. Do not have these (not relevant with support from here) |
| sos5                                                                                                           | Other people with type 1 diabetes                                                | 1. Not supportive<br>2. Somewhat supportive<br>3. Very supportive<br>4. Do not have these (not relevant with support from here) |
| sos6                                                                                                           | People on social media (e.g. in Facebook groups for people with type 1 diabetes) | 1. Not supportive<br>2. Somewhat supportive<br>3. Very supportive<br>4. Do not have these (not relevant with support from here) |

## Page 17 of 28

| Scale/item [branching logic]                                                                                                                                                                                       | Question                                                                             | Response categories                                                           |
|--------------------------------------------------------------------------------------------------------------------------------------------------------------------------------------------------------------------|--------------------------------------------------------------------------------------|-------------------------------------------------------------------------------|
| <p><b>We want to know how you perceive your own abilities to do and achieve the things you want to in your life with diabetes.</b></p> <p><b>Please state to what degree the following statements fit you.</b></p> |                                                                                      |                                                                               |
| selfeffi1                                                                                                                                                                                                          | I can always manage to solve difficult problems if I try hard enough                 | 1. Not at all true<br>2. Hardly true<br>3. Moderately true<br>4. Exactly true |
| selfeffi2                                                                                                                                                                                                          | If someone opposes me, I can find the means and ways to get what I want              | 1. Not at all true<br>2. Hardly true<br>3. Moderately true<br>4. Exactly true |
| selfeffi3                                                                                                                                                                                                          | It is easy for me to stick to my aims and accomplish my goals                        | 1. Not at all true<br>2. Hardly true<br>3. Moderately true<br>4. Exactly true |
| selfeffi4                                                                                                                                                                                                          | I am confident that I could deal efficiently with unexpected events                  | 1. Not at all true<br>2. Hardly true<br>3. Moderately true<br>4. Exactly true |
| selfeffi5                                                                                                                                                                                                          | Thanks to my resourcefulness, I know how to handle unforeseen situations             | 1. Not at all true<br>2. Hardly true<br>3. Moderately true<br>4. Exactly true |
| selfeffi6                                                                                                                                                                                                          | I can solve most problems if I invest the necessary effort                           | 1. Not at all true<br>2. Hardly true<br>3. Moderately true<br>4. Exactly true |
| selfeffi7                                                                                                                                                                                                          | I can remain calm when facing difficulties because I can rely on my coping abilities | 1. Not at all true<br>2. Hardly true<br>3. Moderately true<br>4. Exactly true |
| selfeffi8                                                                                                                                                                                                          | When I am confronted with a problem, I can usually find several solutions            | 1. Not at all true<br>2. Hardly true<br>3. Moderately true<br>4. Exactly true |



|            |                                                       |                                                                               |
|------------|-------------------------------------------------------|-------------------------------------------------------------------------------|
| selfeffi9  | If I am in trouble, I can usually think of a solution | 1. Not at all true<br>2. Hardly true<br>3. Moderately true<br>4. Exactly true |
| selfeffi10 | I can usually handle whatever comes my way            | 1. Not at all true<br>2. Hardly true<br>3. Moderately true<br>4. Exactly true |

| Scale/item<br>[branching logic]            | Question                                                                                                                                                                             | Response categories                                                    |
|--------------------------------------------|--------------------------------------------------------------------------------------------------------------------------------------------------------------------------------------|------------------------------------------------------------------------|
| Long-term blood glucose (HbA1c)            |                                                                                                                                                                                      |                                                                        |
| hba1c_intro                                | What long-term blood sugar level (HbA1c) would you yourself like to be at? You can enter your answer in either % or mmol/mol by indicating your preference here.                     | 1. %<br>2. mmol/mol<br>3. I have not set myself a fixed goal for HbA1c |
| hba1c_goal_percent<br>[if hba1c_intro = 1] | HbA1c (%)                                                                                                                                                                            | Open-ended response                                                    |
| hba1c_goal_mmol<br>[if hba1c_intro = 2]    | HbA1c (mmol/mol)                                                                                                                                                                     | Open-ended response                                                    |
| hba1c_realistic [if<br>hba1c_intro ≠ 3]    | How likely do you think it is that you will have achieved/stayed on that particular long-term blood sugar level (HbA1c) in a year? Please indicate your answer on a scale from 0-10. | 0. Completely unlikely<br>10. Completely likely                        |

## Page 19 of 28

| Scale/item<br>[branching logic]                                                                  | Question                                                                                                                                           | Response<br>categories                                                                                                                        |
|--------------------------------------------------------------------------------------------------|----------------------------------------------------------------------------------------------------------------------------------------------------|-----------------------------------------------------------------------------------------------------------------------------------------------|
| <b>The next questions are more about your general health and overall satisfaction with life.</b> |                                                                                                                                                    |                                                                                                                                               |
| healthstatus                                                                                     | How good or bad do you consider your health today? Please indicate your answer on a scale from 0-10.                                               | 0. Very bad<br>10. Very good                                                                                                                  |
| satisfaction                                                                                     | How satisfied are you with your life today all things considered? Please indicate your answer on a scale from 0-10.                                | 0. Not at all satisfied<br>10. Completely satisfied                                                                                           |
| who5_intro                                                                                       | Please indicate for each of the 5 statements which is closest to how you have been feeling over the past 2 weeks.<br><br>Over the past 2 weeks ... |                                                                                                                                               |
| who51                                                                                            | ... I have felt cheerful and in good spirits                                                                                                       | 1. All of the time<br>2. Most of the time<br>3. More than half the time<br>4. Less than half the time<br>5. Some of the time<br>6. At no time |
| who52                                                                                            | ... I have felt calm and relaxed                                                                                                                   | 1. All of the time<br>2. Most of the time<br>3. More than half the time<br>4. Less than half the time<br>5. Some of the time<br>6. At no time |
| who53                                                                                            | ... I have felt active and vigorous                                                                                                                | 1. All of the time<br>2. Most of the time<br>3. More than half the time<br>4. Less than half the time<br>5. Some of the time<br>6. At no time |
| who54                                                                                            | ... I woke up feeling fresh and rested                                                                                                             | 1. All of the time<br>2. Most of the time<br>3. More than half the time                                                                       |

|       |                                                                |                                                                                                                                               |
|-------|----------------------------------------------------------------|-----------------------------------------------------------------------------------------------------------------------------------------------|
|       |                                                                | 4. Less than half the time<br>5. Some of the time<br>6. At no time                                                                            |
| who55 | ... my daily life has been filled with things that interest me | 1. All of the time<br>2. Most of the time<br>3. More than half the time<br>4. Less than half the time<br>5. Some of the time<br>6. At no time |

## Page 20 of 28

| Scale/item<br>[branching logic]                                                                                                   | Question                                                                             | Response<br>categories                                                                                                                                                      |
|-----------------------------------------------------------------------------------------------------------------------------------|--------------------------------------------------------------------------------------|-----------------------------------------------------------------------------------------------------------------------------------------------------------------------------|
| <b>The COVID-19 pandemic may impact the lives and opportunities of insulin pump users in relation to treatment and education.</b> |                                                                                      |                                                                                                                                                                             |
| covid19_intro                                                                                                                     | How is the COVID-19 pandemic CURRENTLY impacting the following aspects of your life? |                                                                                                                                                                             |
| covid1                                                                                                                            | Your diabetes                                                                        | 1. Very negative impact<br>2. Negative impact<br>3. Slightly negative impact<br>4. No impact<br>5. Slightly positive impact<br>6. Very positive impact<br>7. Not applicable |
| covid2                                                                                                                            | Your sleep                                                                           | 1. Very negative impact<br>2. Negative impact<br>3. Slightly negative impact<br>4. No impact<br>5. Slightly positive impact<br>6. Very positive impact<br>7. Not applicable |
| covid3                                                                                                                            | Your physical health                                                                 | 1. Very negative impact<br>2. Negative impact<br>3. Slightly negative impact<br>4. No impact<br>5. Slightly positive impact<br>6. Very positive impact<br>7. Not applicable |
| covid4                                                                                                                            | Your emotional wellbeing                                                             | 1. Very negative impact                                                                                                                                                     |

|        |                                                       |                                                                                                                                                                             |
|--------|-------------------------------------------------------|-----------------------------------------------------------------------------------------------------------------------------------------------------------------------------|
|        |                                                       | 2. Negative impact<br>3. Slightly negative impact<br>4. No impact<br>5. Slightly positive impact<br>6. Very positive impact<br>7. Not applicable                            |
| covid5 | Your financial situation                              | 1. Very negative impact<br>2. Negative impact<br>3. Slightly negative impact<br>4. No impact<br>5. Slightly positive impact<br>6. Very positive impact<br>7. Not applicable |
| covid6 | Your relationship with your family, friends and peers | 1. Very negative impact<br>2. Negative impact<br>3. Slightly negative impact<br>4. No impact<br>5. Slightly positive impact<br>6. Very positive impact<br>7. Not applicable |
| covid7 | Your leisure activities                               | 1. Very negative impact<br>2. Negative impact<br>3. Slightly negative impact<br>4. No impact<br>5. Slightly positive impact<br>6. Very positive impact<br>7. Not applicable |
| covid8 | Your work or studies                                  | 1. Very negative impact                                                                                                                                                     |

|           |                                                                                                                                                                 |                                                                                                                                                                             |
|-----------|-----------------------------------------------------------------------------------------------------------------------------------------------------------------|-----------------------------------------------------------------------------------------------------------------------------------------------------------------------------|
|           |                                                                                                                                                                 | 2. Negative impact<br>3. Slightly negative impact<br>4. No impact<br>5. Slightly positive impact<br>6. Very positive impact<br>7. Not applicable                            |
| covid9    | Your feelings about the future                                                                                                                                  | 1. Very negative impact<br>2. Negative impact<br>3. Slightly negative impact<br>4. No impact<br>5. Slightly positive impact<br>6. Very positive impact<br>7. Not applicable |
| covidrisk | How likely do you think it is for you to be become seriously ill if you get infected with the COVID-19 virus? Please indicate your answer on a scale from 0-10. | 0. Completely unlikely<br>10. Completely likely                                                                                                                             |

| Scale/item<br>[branching<br>logic]                                                                                                                                                                                                                                                                                                                                                                                   | Question                                                                                                                                                                                                                                                                                                                                                                                 | Response<br>categories                                                                                            |
|----------------------------------------------------------------------------------------------------------------------------------------------------------------------------------------------------------------------------------------------------------------------------------------------------------------------------------------------------------------------------------------------------------------------|------------------------------------------------------------------------------------------------------------------------------------------------------------------------------------------------------------------------------------------------------------------------------------------------------------------------------------------------------------------------------------------|-------------------------------------------------------------------------------------------------------------------|
| <p><b>You are now finished with the part of the questionnaire about your diabetes and your insulin pump.</b></p> <p><b>We hope you also want to answer the next questions, which are more about you in general terms. Your answer to these questions will be used to gain an understanding of how people make decisions.</b></p> <p><b>The questions are not a test and there are no right or wrong answers.</b></p> |                                                                                                                                                                                                                                                                                                                                                                                          |                                                                                                                   |
| lottery                                                                                                                                                                                                                                                                                                                                                                                                              | Imagine that you unexpectedly inherit 2,500 kr from a distant relative. You then get the opportunity to participate in a lottery with an equal chance of either doubling the money to 5,000 kr. or losing the money. This means that there is a 50% chance that you will walk away with 5,000 kr. and a 50% chance of losing the 2,500 kr. Which choice would you make in this scenario? | 1. I choose to participate in the lottery<br>2. I choose not to participate in the lottery and keep the 2,500 kr. |



| Scale/item<br>[branching logic]                         | Question                                                                                                                      | Response<br>categories                        |
|---------------------------------------------------------|-------------------------------------------------------------------------------------------------------------------------------|-----------------------------------------------|
| <b>Where do you stand with regards to taking risks?</b> |                                                                                                                               |                                               |
| risk1                                                   | Are you someone who is willing to take risks in general? Please indicate your answer on a scale from 0-10.                    | 0. Fully<br>unwilling<br>10. Fully<br>willing |
| risk2                                                   | Are you someone who is willing to take risks with your health in general? Please indicate your answer on a scale from 0-10.   | 0. Fully<br>unwilling<br>10. Fully<br>willing |
| risk3                                                   | Are you someone who is willing to take risks with your financial situation? Please indicate your answer on a scale from 0-10. | 0. Fully<br>unwilling<br>10. Fully<br>willing |

| Scale/item<br>[branching logic]           | Question                                                                                                                                                         | Response<br>categories                          |
|-------------------------------------------|------------------------------------------------------------------------------------------------------------------------------------------------------------------|-------------------------------------------------|
| <b>How patient and impulsive are you?</b> |                                                                                                                                                                  |                                                 |
| patience                                  | In general, how patient are you? Please indicate your answer on a scale from 0-10.                                                                               | 0. Very impatient<br>10. Very patient           |
| impulsive                                 | Are you a person who generally acts impulsively, or do you think a lot about things before you act? Please indicate your answer on a scale from 0-10.            | 0. Not impulsive at all<br>10. Very impulsive   |
| riskage                                   | Think about the future. How likely do you think it is that you will experience your 90 <sup>th</sup> birthday? Please indicate your answer on a scale from 0-10. | 0. Completely unlikely<br>10. Completely likely |

| Scale/item [branching logic] | Question                                                                | Response categories                                                                                   |
|------------------------------|-------------------------------------------------------------------------|-------------------------------------------------------------------------------------------------------|
| liveplando_intro             | To what degree do you agree with the following statements?              |                                                                                                       |
| livelife                     | I live life one day at a time and do not think too much about my future | 1. Strongly disagree<br>2. Disagree<br>3. Neither disagree nor agree<br>4. Agree<br>5. Strongly agree |
| planlife                     | I plan everything in good time                                          | 1. Strongly disagree<br>2. Disagree<br>3. Neither disagree nor agree<br>4. Agree<br>5. Strongly agree |
| dolife                       | When I set a goal for myself, I always achieve it                       | 1. Strongly disagree<br>2. Disagree<br>3. Neither disagree nor agree<br>4. Agree<br>5. Strongly agree |

## Page 25 of 28

| Scale/item<br>[branching logic]                                                                                                                     | Question                                                                                                                                                                                                                                                                                                                                                                                                                        | Response<br>categories                       |
|-----------------------------------------------------------------------------------------------------------------------------------------------------|---------------------------------------------------------------------------------------------------------------------------------------------------------------------------------------------------------------------------------------------------------------------------------------------------------------------------------------------------------------------------------------------------------------------------------|----------------------------------------------|
| <p><b>The following questions are about time and money.</b></p> <p><b>The questions are not a test and there are no right or wrong answers.</b></p> |                                                                                                                                                                                                                                                                                                                                                                                                                                 |                                              |
| priselist_intro1                                                                                                                                    | <p>Imagine that you can choose between getting 5,000 kr. today or another amount in 1 year. What amount do you prefer in each of the following seven situations? The money is yours no matter what, and there is no risk of you losing a future amount if you choose to wait.</p> <p>We have filled out the first answer for you as we believe you would prefer to have 5,000 kr. in your hand today rather than in 1 year.</p> |                                              |
| pricelist1                                                                                                                                          |                                                                                                                                                                                                                                                                                                                                                                                                                                 | 1. 5,000 kr. today<br>2. 5,000 kr. in a year |
| pricelist2                                                                                                                                          |                                                                                                                                                                                                                                                                                                                                                                                                                                 | 1. 5,000 kr. today<br>2. 5,100 kr. in a year |
| pricelist3                                                                                                                                          |                                                                                                                                                                                                                                                                                                                                                                                                                                 | 1. 5,000 kr. today<br>2. 5,250 kr. in a year |
| pricelist4                                                                                                                                          |                                                                                                                                                                                                                                                                                                                                                                                                                                 | 1. 5,000 kr. today<br>2. 5,500 kr. in a year |
| pricelist5                                                                                                                                          |                                                                                                                                                                                                                                                                                                                                                                                                                                 | 1. 5,000 kr. today<br>2. 6,000 kr. in a year |
| pricelist6                                                                                                                                          |                                                                                                                                                                                                                                                                                                                                                                                                                                 | 1. 5,000 kr. today<br>2. 7000 kr. in a year  |
| pricelist7                                                                                                                                          |                                                                                                                                                                                                                                                                                                                                                                                                                                 | 1. 5,000 kr. today<br>2. 9000 kr. in a year  |

## Page 26 of 28

| Scale/item<br>[branching logic]                                                                                                                                                                                                                                                                                                                                                           | Question                                                                                                          | Response<br>categories |
|-------------------------------------------------------------------------------------------------------------------------------------------------------------------------------------------------------------------------------------------------------------------------------------------------------------------------------------------------------------------------------------------|-------------------------------------------------------------------------------------------------------------------|------------------------|
| <p>The next questions are like the previous, only now the time horizon varies.</p> <p>How much would you require in addition to the 5,000 kr. to wait for the money in each scenario?</p> <p>There are no right or wrong answers.</p> <p>When you enter an amount, the total sum is calculated in the following field, and you therefore do not have to write anything in this field.</p> |                                                                                                                   |                        |
| tp1                                                                                                                                                                                                                                                                                                                                                                                       | How much money would you require in addition to the 5,000 kr. if you had to wait <u>1 month</u> to get the money? | Open-ended response    |
| tp1_calc [if tp1 ≠ .]                                                                                                                                                                                                                                                                                                                                                                     | This means that instead of 5,000 kr. today, you will get...                                                       | X kr. in 1 month       |
| tp2                                                                                                                                                                                                                                                                                                                                                                                       | Against waiting <u>3 months</u> ?                                                                                 | Open-ended response    |
| tp2_calc [if tp2 ≠ .]                                                                                                                                                                                                                                                                                                                                                                     | This means that instead of 5,000 kr. today, you will get                                                          | X kr. in 3 months      |
| tp3                                                                                                                                                                                                                                                                                                                                                                                       | Against waiting <u>6 months</u> ?                                                                                 | Open-ended response    |
| tp3_calc [if tp3 ≠ .]                                                                                                                                                                                                                                                                                                                                                                     | This means that instead of 5,000 kr. today, you will get                                                          | X kr. in 6 months      |
| tp4                                                                                                                                                                                                                                                                                                                                                                                       | Against waiting <u>12 months</u> ?                                                                                | Open-ended response    |
| tp4_calc [if tp4 ≠ .]                                                                                                                                                                                                                                                                                                                                                                     | This means that instead of 5,000 kr. today, you will get                                                          | X kr. in 12 months     |
| tp5                                                                                                                                                                                                                                                                                                                                                                                       | Against waiting <u>24 months</u> ?                                                                                | Open-ended response    |
| tp5_calc [if tp5 ≠ .]                                                                                                                                                                                                                                                                                                                                                                     | This means that instead of 5,000 kr. today, you will get                                                          | X kr. in 24 months     |

Page 27 of 28

| Scale/item<br>[branching logic]                                                       | Question                                                                                                                                     | Response<br>categories |
|---------------------------------------------------------------------------------------|----------------------------------------------------------------------------------------------------------------------------------------------|------------------------|
| Now imagine a situation where you cannot get the 5,000 kr. before 12 months from now. |                                                                                                                                              |                        |
| tp24                                                                                  | How much money would you require in addition to the 5,000 kr. <u>in 12 months</u> for you to wait <u>another 12 months</u> to get the money? | Open-ended response    |
| tp24_calc                                                                             | This means that instead of getting 5,000 kr. in 12 months you will get                                                                       | X kr. in 24 months     |

## Page 28 of 28

| Scale/item [branching logic]                                                                                                                                                                                                                                                                                                    | Question                                                                                                                                                                                                                                                                                                                                                                                                                                                                                                                                                                                                               | Response categories                                                                                                                                                                                                                                                                             |
|---------------------------------------------------------------------------------------------------------------------------------------------------------------------------------------------------------------------------------------------------------------------------------------------------------------------------------|------------------------------------------------------------------------------------------------------------------------------------------------------------------------------------------------------------------------------------------------------------------------------------------------------------------------------------------------------------------------------------------------------------------------------------------------------------------------------------------------------------------------------------------------------------------------------------------------------------------------|-------------------------------------------------------------------------------------------------------------------------------------------------------------------------------------------------------------------------------------------------------------------------------------------------|
| <b>Thank you so much for your help!</b><br><br><b>Your reply will help us to learn more about how people with type 1 diabetes use and live with their insulin pump. We will use this knowledge to improve treatment options for insulin pump users at Nordsjællands Hospital Hillerød and Steno Diabetes Center Copenhagen.</b> |                                                                                                                                                                                                                                                                                                                                                                                                                                                                                                                                                                                                                        |                                                                                                                                                                                                                                                                                                 |
| sdcctnoh                                                                                                                                                                                                                                                                                                                        | Are you treated at Nordsjællands Hospital Hillerød or Steno Diabetes Center Copenhagen?                                                                                                                                                                                                                                                                                                                                                                                                                                                                                                                                | 1. Nordsjællands Hospital Hillerød<br>2. Steno Diabetes Center Copenhagen                                                                                                                                                                                                                       |
| contact                                                                                                                                                                                                                                                                                                                         | Can we send you a similar questionnaire in a year?                                                                                                                                                                                                                                                                                                                                                                                                                                                                                                                                                                     | 1. Yes<br>2. No                                                                                                                                                                                                                                                                                 |
| panel                                                                                                                                                                                                                                                                                                                           | <p>At Steno Diabetes Center Copenhagen, we carry out numerous research projects with different research subjects on an ongoing basis. In the context of this, we have been given permission to create a register of people interested in participating in new research projects.</p> <p>By ticking here, you agree that we may contact you with information about the possibility of participation in upcoming research projects/trials. Your consent is valid for 1 year. You can say no to participating in the trials at any time, just as you can always withdraw your consent to be included in the register.</p> | 1. Yes, I would like to be included in the register and contacted via e-Boks when new research projects come in<br>2. Yes, I would like to be included in the register and contacted via e-Boks and/or phone when new research projects come in.<br>3. I do not want to be part of the register |
| phone [if panel = 2]                                                                                                                                                                                                                                                                                                            | Please provide a phone number we may contact you at. Enter only the 8 digits.                                                                                                                                                                                                                                                                                                                                                                                                                                                                                                                                          | Open-ended response.                                                                                                                                                                                                                                                                            |
| carbcountanswer_intro                                                                                                                                                                                                                                                                                                           | Bonus info: fact list for the carbohydrate counting exercise!                                                                                                                                                                                                                                                                                                                                                                                                                                                                                                                                                          |                                                                                                                                                                                                                                                                                                 |
| carbcountanswer1                                                                                                                                                                                                                                                                                                                | Chocolate: You replied that there are [choco4] grams of carbohydrates in the chocolate in the selected image. The exact amount of carbohydrates is:                                                                                                                                                                                                                                                                                                                                                                                                                                                                    | X                                                                                                                                                                                                                                                                                               |
| carbcountanswer2                                                                                                                                                                                                                                                                                                                | Pasta: You replied that there is [pasta4] grams of carbohydrates in the pasta in the selected image. The exact amount of carbohydrates is:                                                                                                                                                                                                                                                                                                                                                                                                                                                                             | X                                                                                                                                                                                                                                                                                               |
| carbcountanswer3                                                                                                                                                                                                                                                                                                                | Grapes: You replied that there are [grapes4] grams of carbohydrates in the grapes in the selected image. The exact amount of carbohydrates is:                                                                                                                                                                                                                                                                                                                                                                                                                                                                         | X                                                                                                                                                                                                                                                                                               |

|                  |                                                                                                                                                  |   |
|------------------|--------------------------------------------------------------------------------------------------------------------------------------------------|---|
| carbcountanswer4 | Buns: You replied that there are [bun4] grams of carbohydrates in the bread roll on the selected image.<br>The exact amount of carbohydrates is: | X |
|------------------|--------------------------------------------------------------------------------------------------------------------------------------------------|---|
